# Supplementary material for: Fluorescence emission enhancement of a T-shaped benzimidazole with a mechanically-interlocked ‘suit’
Source: Royal Society of Chemistry journal article supplement (doi:10.1039/d0cc07471c), 2021-01-01
Supplement: d0cc07471c1.pdf [file d0cc07471c1.pdf]

## Supplementary Information

### Fluorescence Emission Enhancement of a T-Shaped Benzimidazole with a Mechanically-Interlocked 'Suit'

Houyang Xu, Meng-Di Lin, Jun Yuan, Baiyang Zhou, and Yingxiao Mu, Yanping Huo and Kelong Zhu\*

#### Table of Contents

|                                                                                                     |    |
|-----------------------------------------------------------------------------------------------------|----|
| Synthetic Methods.....                                                                              | 3  |
| Synthesis of <b>8</b> .....                                                                         | 3  |
| Synthesis of <b>9</b> .....                                                                         | 4  |
| Synthesis of <b>4</b> .....                                                                         | 4  |
| Synthesis of <b>1b</b> .....                                                                        | 4  |
| Synthesis of [ <b>1b-H</b> ][BF <sub>4</sub> ].....                                                 | 4  |
| Synthesis of <b>11</b> .....                                                                        | 5  |
| Synthesis of <b>12</b> .....                                                                        | 5  |
| Synthesis of <b>13</b> .....                                                                        | 5  |
| Synthesis of <b>5</b> .....                                                                         | 6  |
| Synthesis of <b>6</b> .....                                                                         | 6  |
| Synthesis of <b>2c</b> .....                                                                        | 6  |
| Synthesis of [ <b>3-H</b> ][BF <sub>4</sub> ].....                                                  | 7  |
| Synthesis of <b>3</b> .....                                                                         | 7  |
| Determination of Association Constant between [ <b>1b-H</b> ][BF <sub>4</sub> ] and <b>2c</b> ..... | 7  |
| NMR Spectra of Compounds.....                                                                       | 9  |
| UV-Vis Spectra.....                                                                                 | 17 |
| Fluorescence Emission Spectra.....                                                                  | 19 |
| Details of Fluorescence Quantum Yields.....                                                         | 23 |
| Details of X-ray Crystallography.....                                                               | 24 |
| References.....                                                                                     | 25 |

## General Comments

Chemicals were purchased from commercial suppliers and used without further purification unless stated otherwise. Tetrahydrofuran (THF), dichloromethane (DCM) and N, N-dimethylacetamide (DMF) were degassed and dried under nitrogen by passing them through a Vigor VSGS-5 Solvent Purification System. Reaction progress was monitored by thin layer chromatography (TLC) or on an Advion Plate Express® Automated TLC plate reader (TLC/CMS). Flash column chromatography was performed over silica gel (200-300 mesh). NMR spectra were recorded on a JEOL 400YH instrument. NMR spectra were internally referenced to tetramethylsilane ( $^1\text{H}$ ) or alternatively, to the residual proton solvent signal ( $^{13}\text{C}$ ). All  $^{13}\text{C}$  NMR spectra were recorded with complete proton decoupling. UV-vis absorbance spectra were recorded on a Shimadzu UV-2600 spectrophotometer. Fluorescence spectra were recorded on a Shimadzu RF-6000 fluorescence spectrometer. The fluorescence quantum yields of liquid samples were determined by a Hamamatsu C9920 quantum efficiency measurement system. The fluorescence quantum yields of solid powders were measured on a spectrometer (FLS980) from Edinburgh Instruments Ltd. with an integrating sphere ( $\varphi$  150 mm). ESI-MS data were recorded either on an Advion Expression LCMS instrument or a Thermo Fisher Scientific LTQ Orbitrap Elite LC/MS (ESI). HR-ESI-MS data were recorded on a Bruker timsTOF™ mass spectrometer.

## Synthetic Methods

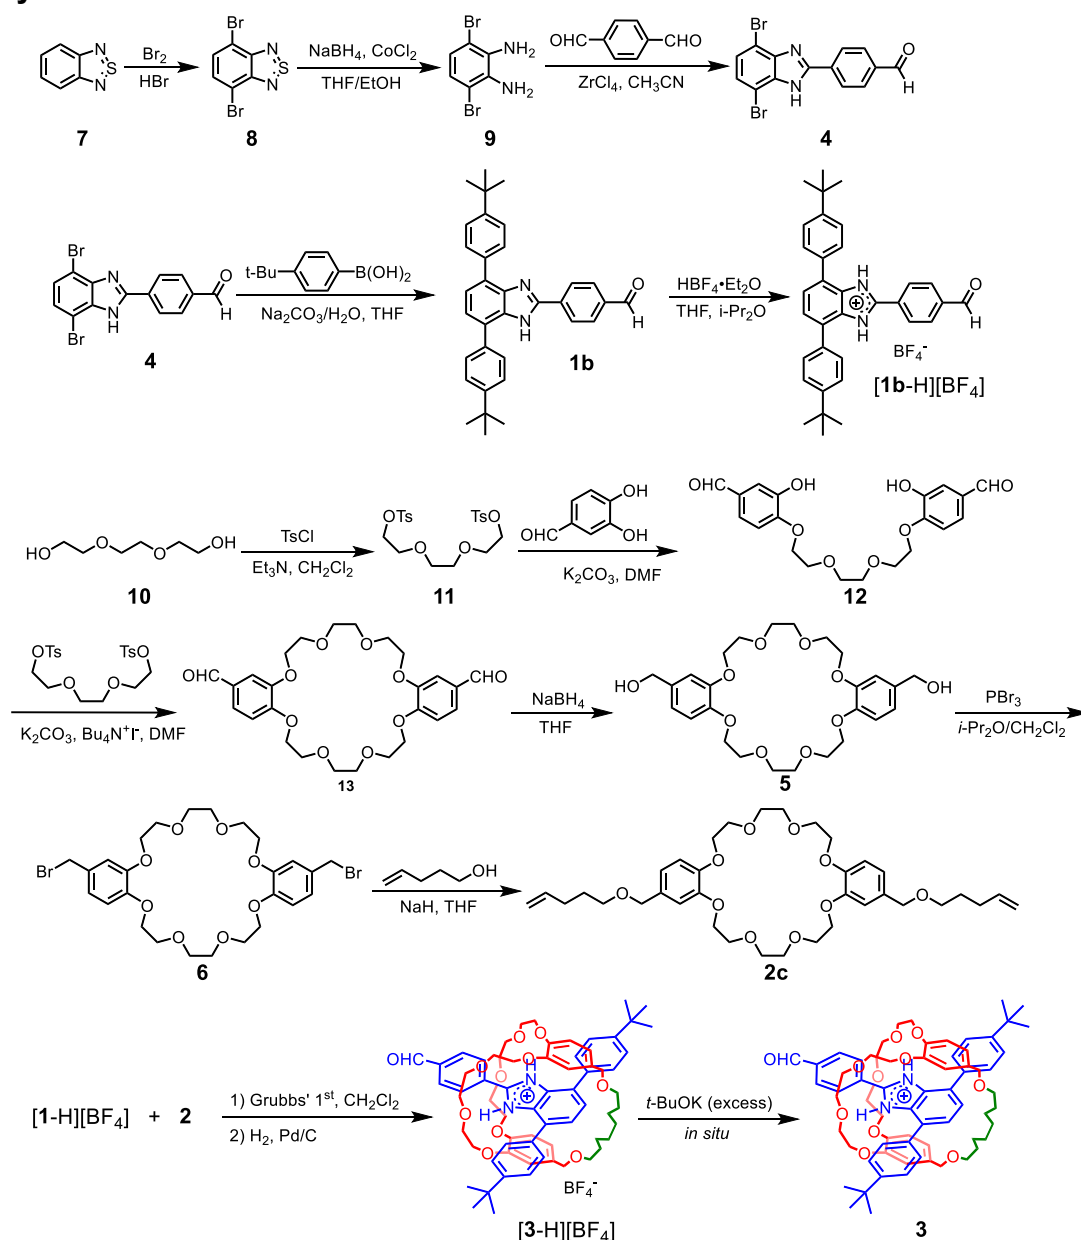

**Scheme S1** Synthetic steps of compounds in this work.

### Synthesis of **8**

Compound **8** was synthesized using a reported literature method.<sup>1</sup> Benzothiadiazole (**5**, 10.00 g, 73.4 mmol) was dissolved in an aqueous solution of  $\text{HBr}$  (150 mL, 48%). A solution of  $\text{Br}_2$  (35.20 g, 11.3 mL) in  $\text{HBr}$  (100 mL, 48%) was added dropwise to form a mixture, which was stirred, heated to  $100\text{ }^\circ\text{C}$  and refluxed for 6 hours. An orange solid should precipitate during the reaction. After the mixture was cooled to room temperature, a saturated solution of  $\text{NaHSO}_3$  was added dropwise to quench the excess  $\text{Br}_2$ . The mixture was then filtered, with the filtrate washed with water ( $5 \times 100\text{ mL}$ ), and dried under vacuum to give **8** as a yellow crystalline solid. Yield: 20.48 g, 95%.  $^1\text{H NMR}$  (400 MHz,  $\text{CDCl}_3$ , 298 K)  $\delta = 7.71$  (s, 2H).

### Synthesis of **9**

To a solution of 4,7-dibromobenzothiodiazole (**9**) (5.000 g, 17.0 mmol) in THF/EtOH (1 : 3) (250 mL), NaBH<sub>4</sub> (1.930 g, 51.0 mmol) was added in portions. After addition, CoCl<sub>2</sub>·6H<sub>2</sub>O (405 mg, 1.70 mmol) was added. The resulting black mixture was refluxed for 30 min, cooled to room temperature and then filtered. The filtrate was concentrated and partitioned between brine (100 mL) and CH<sub>2</sub>Cl<sub>2</sub> (3 × 100 mL). The combined organic phase was dried over anhydrous Na<sub>2</sub>SO<sub>4</sub>. Removal of the solvent under vacuum gave **7** as a black tar. Yield: 4.306 g, 95%. <sup>1</sup>H NMR (400 MHz, CDCl<sub>3</sub>, 298 K) δ = 6.85 (s, 2H).

### Synthesis of **4**

**9** (4.306 g, 16.2 mmol) was dissolved in 120 mL of CH<sub>3</sub>CN. Terephthalaldehyde (21.72 g, 162 mmol), and ZrCl<sub>4</sub> (377 mg, 1.62 mmol) were added to the solution. The mixture was stirred at room temperature for 24 h and filtered. The solids were washed with CH<sub>3</sub>CN (3 × 50 mL). A pale yellow solid (**7**) was obtained after air drying. Yield: 3.380 g, 55 %. <sup>1</sup>H NMR (400 MHz, CD<sub>3</sub>SOCD<sub>3</sub>, 298 K): δ = 13.52 (b, 1H), 10.10 (s, 1H), 8.55 (d, J = 8.1 Hz, 2H), 8.10 (d, J = 8.1 Hz, 2H), 7.43 (s, 2H).

### Synthesis of **1b**

In a Schlenk flask, **4** (500 mg, 1.32 mmol), *p*-(*t*-butyl)phenyl boronic acid (515 mg, 2.89 mmol), palladium *tetrakis* (triphenylphosphine) (152 mg, 0.132 mmol) was added. After the flask was degassed and backfilled with N<sub>2</sub>, A degassed solution of Na<sub>2</sub>CO<sub>3</sub> (30 mL) and degassed THF (30 mL) was added. The reaction mixture was heated to 80 °C, stirred for 24 h under nitrogen, and then cooled to room temperature. Ethyl acetate (50 mL) was added and the phases were separated. The aqueous phase was extracted with ethyl acetate (2 × 50 mL) and the combined organic phases were washed once with brine (50 mL), dried on sodium sulphate and concentrated under reduced pressure. The crude compound was further purified by column chromatography on silica gel (elutes with PE:EA = 4:1), affording a pale yellow solid. Yield: 610 mg, 94 %. <sup>1</sup>H NMR (400 MHz, CD<sub>2</sub>Cl<sub>2</sub>, 298 K) δ = 10.03 (s, 1H), 8.24(d, 2H, J = 8.4 Hz), 7.98 (d, 2H, J = 8.4 Hz), 7.90-7.80 (m, 4H), 7.59 (d, 2H, J = 8.1 Hz), 7.47 (s, 2H), 1.41 (s, 18H).

### Synthesis of [**1b-H**][BF<sub>4</sub>]

To a solution of **1b** (100 mg, 0.205 mmol, 1 eq) in diisopropyl ether (50 mL), tetrafluoroboric acid diethyl ether complex (39.9 mg, 0.247 mmol, 1.2 eq) was added dropwise. The resulting yellow solid was filtered, washed with diisopropyl ether and air dried. Yield: 112 mg, 95 %. <sup>1</sup>H NMR (400 MHz, CDCl<sub>3</sub>, 298 K) δ = 9.53 (s, 1H), 8.13 (d, 2H, J = 8.5 Hz), 7.69 (m, 8H), 7.56 (d, 2H, J = 8.0 Hz), 1.43 (s, 18H).

### Synthesis of **11**

Triethyleneglycol (33.00 g, 220 mmol) and triethylamine (53.37 g, 527 mmol) were dissolved in CH<sub>2</sub>Cl<sub>2</sub> (250 mL) and the solution was cooled down to 0 °C. A solution of tosyl chloride (100.6 g, 527 mmol) and were added through a dropping funnel. The resulting mixture was stirred for 16h at room temperature. The solution was washed with 5% HCl (aq) (50 mL), saturated NaHCO<sub>3</sub> (50 mL), H<sub>2</sub>O (50 mL) in sequence. The organic layer was dried over Na<sub>2</sub>SO<sub>4</sub>. After evaporation of solvent, the crude product was purified via recrystallization in MeOH, affording a white to transparent crystalline powder. Yield: 93.10 g, 92 %. <sup>1</sup>H NMR (400 MHz, CDCl<sub>3</sub>, 298 K) δ = 7.78 (d, J = 8.0 Hz, 4H), 7.33 (d, J = 8.0 Hz, 4H), 4.13 (t, J = 4.8 Hz, 4H), 3.65 (t, J = 4.8 Hz, 4H), 3.52 (s, 4H), 2.44 (s, 6H).

### Synthesis of **12**

The synthesis of **12** and **13** was carried out according to a literature method reported by Stoddart et al.<sup>2</sup> A solution of **11** (19.00 g, 0.0414 mol), 3,4-dihydroxybenzaldehyde (11.45 g, 0.0829 mol), and K<sub>2</sub>CO<sub>3</sub> (11.45 g, 0.0829 mol) in 120 mL of DMF was heated at 60 °C for 5 h under N<sub>2</sub>. Removal of the solvent in vacuo afforded a black tar, which was partitioned between H<sub>2</sub>O (250 mL) and CH<sub>2</sub>Cl<sub>2</sub> (3 × 150 mL). The aqueous layer was extracted with H<sub>2</sub>O (100 mL) and CH<sub>2</sub>Cl<sub>2</sub> (3 × 200 mL). The combined organic layers were dried (Na<sub>2</sub>SO<sub>4</sub>) and the solvent was evaporated to yield a black tar which was purified by flash chromatography (SiO<sub>2</sub>: EtOAc) to afford **12** as a white solid. Yield: 4.362 g, 27 %. <sup>1</sup>H NMR (400 MHz, CDCl<sub>3</sub>): δ = 9.82 (s, 2H), 7.42 (d, 2H, J = 2.0 Hz), 7.39 (d, 2H, J = 2.0 Hz), 7.37 (d, 2H, J = 2.0 Hz), 6.96 (d, 2H, J = 8.3 Hz), 4.28-4.24 (m, 4H), 3.93-3.89 (m, 4H), 3.79 (s, 4H).

### Synthesis of **13**

**11** (3.520 g, 7.68 mmol) and diol **12** (3.000 g, 7.68 mmol) were dissolved in DMF (250 mL). K<sub>2</sub>CO<sub>3</sub> (10.62 g, 76.8 mmol), and *n*-Bu<sub>4</sub>NI (TBAI, 284 mg, X 0.768 mmol) were added to the solution. The temperature of the reaction was raised to 60 °C and stirred for 72 hours and then cooled to room temperature. The reaction mixture was filtered and the solid washed with DMF (50 mL). Removal of the solvent *in vacuo* afforded a yellow residue, which was partitioned between H<sub>2</sub>O (150 mL) and CH<sub>2</sub>Cl<sub>2</sub> (3 × 150 mL). The combined organic layers were dried (Na<sub>2</sub>SO<sub>4</sub>) and the solvent was evaporated off to obtain a residue which was purified by flash chromatography (SiO<sub>2</sub>: EtOAc) to give **13** as a white solid. Yield: 2.071 g, 53 %. <sup>1</sup>H NMR (400 MHz, CDCl<sub>3</sub>): δ = δ = 9.91 (s, 2H), 7.43 (d, 2H J = 1.9 Hz), 7.40 (d, 2H J = 1.9 Hz), 7.36 (d, 2H J = 1.9 Hz), 6.92 (d, 2H, J = 8.2 Hz), 4.23-4.17 (m, 8H), 3.97-3.91 (m, 8H), 3.86-3.81 (m, 8H).

### Synthesis of **5**

A solution of **13** (1.880 g, 3.72 mmol) in THF (50 mL) was cooled down to 0 °C. NaBH<sub>4</sub> (283 mg, 7.45 mmol) was added, and the solution was stirred under N<sub>2</sub> for 24 hours. HCl was added dropwise to quench the reaction. After addition of saturated solution of NaCl (20 mL), the mixture was extracted with EtOAc (4 × 20 mL). The organic phase was dried with Na<sub>2</sub>SO<sub>4</sub> and removed of its solvent in *vacuo*, affording **5** as a transparent solid, which was used in the next step without further purification. Yield: 1.535 g, 82 %. <sup>1</sup>H NMR (400 MHz, CDCl<sub>3</sub>, 298 K): δ = 6.91-6.79 (m, 6H), 4.58 (s, 4H), 4.17-4.12 (m, 8H), 3.92-3.88 (s, 8H), 3.82 (s, 8H).

### Synthesis of **6**

To a sealed flask containing a solution of **5** (1.500 g, 2.95 mmol) in CH<sub>2</sub>Cl<sub>2</sub>/Diisopropyl ether (1:1, 100 mL), phosphorus tribromide (4.79 g, 1.66 mL, 17.7 mmol) was added dropwise with an injector. After stirring for 24 h at room temperature under N<sub>2</sub> protection, CH<sub>2</sub>Cl<sub>2</sub> (50 mL) was added to the mixture and then the solution carefully poured on to ice-water (100 g). The organic phase was separated, washed with saturated NaHCO<sub>3</sub> solution (30 mL) and brine (30 mL). After drying over anhydrous Na<sub>2</sub>SO<sub>4</sub>, the solvent was removed on a rotary evaporator. The oily residue solidified after the addition of ethyl acetate (10 mL). The solid was collected by filtration, rinsed with ether and air dried. Yield: 1.843 g, 98 %. The product was utilised in the next step without further purification. <sup>1</sup>H NMR (400 MHz, CDCl<sub>3</sub>, 298 K): δ = 6.94-6.90 (m, 4H), 6.79 (d, 2H, J = 8.1 Hz), 4.46 (s, 4H), 4.19-4.13 (m, 8H), 3.93-3.89 (m, 8H), 3.81-3.79 (m, 8H). <sup>13</sup>C NMR (100 MHz, CDCl<sub>3</sub>, 298 K): δ 149.09 and 148.88, 130.91, 122.28, 114.82, 113.68, 71.19, 69.77 and 69.74, 69.44, 34.29, 29.78.

### Synthesis of **2c**

Sodium hydride (60% in mineral oil, 631 mg, 15.8 mmol) was dissolved in a minimum amount of THF in a Schlenk flask under N<sub>2</sub> atmosphere. A solution of 4-penten-1-ol (1358 mg, 15.8 mmol) in THF (10 mL) was added dropwise to the mixture. After cessation of bubbling, the mixture was allowed to stir for 1 h at room temperature. A solution of **6** (1000 mg, 1.58 mmol) in THF (60 mL) was then introduced to the mixture in portions by syringe. The mixture was further stirred at room temperature for 24 hours and quenched by carefully addition of water dropwise. After ethyl acetate (30 mL) and brine (30 mL) were added, the organic layer was extracted with ethyl acetate (4 × 30 mL) and dried over anhydrous magnesium sulphate. Removal of the solvent gave a viscous oil which was purified by column chromatography (SiO<sub>2</sub>, ethyl acetate / PE = 1:4) as a colorless oil. Yield: 691 mg, 68 %. <sup>1</sup>H NMR (400 MHz, CDCl<sub>3</sub>, 298 K) δ = 6.88-6.79 (m, 6H), 5.85-5.74 (m, 2H), 5.03-4.91 (m, 4H), 4.39 (s, 4H), 4.16-4.11 (m, 8H), 3.92-3.88 (m, 8H), 3.81 (m, 8H), 3.43 (t, 4H, J = 6.6 Hz), 2.15-3.08 (m, 4H), 1.72-1.64 (m, 4H). <sup>13</sup>C NMR (100 MHz, CDCl<sub>3</sub>, 298 K): δ 149.02, 148.46, 138.37, 131.91, 120.82, 114.80, 113.88, 113.70, 72.75, 71.32, 69.99, 69.61,

69.56 and 69.45, 30.43, 29.02. HR-MS (ESI): 667.3458 calcd for C<sub>36</sub>H<sub>53</sub>O<sub>10</sub> [M+Na]<sup>+</sup>, found: 667.3453; 662.3904 calcd for C<sub>36</sub>H<sub>53</sub>O<sub>10</sub> [M+NH<sub>4</sub>]<sup>+</sup>, found: 662.3901.

### Synthesis of [3-H][BF<sub>4</sub>]

A mixture of [1b-H][BF<sub>4</sub>] (307 mg, 0.533 mmol, 1.5 eq) and **2c** (230 mg, 0.357 mmol, 1.0 eq) in CH<sub>2</sub>Cl<sub>2</sub> (5 mL) was stirred at room temperature for 30 min. Grubbs' 1<sup>st</sup> gen catalyst (30 mg, 0.0365 mmol, 0.1 eq) was added subsequently, the mixture was heated at 43 °C for 24 hours. An additional portion of catalyst (15 mg, 0.0182 mmol, 0.05 eq) was added and heated at 43 °C for another 24 hours. After saturated NaHCO<sub>3</sub> (aq) (10 mL) was added, the organic phase was extracted and removed of its solvent in *vacuo*. The dark oily residue [3-H][BF<sub>4</sub>] was purified by column chromatography (SiO<sub>2</sub>, CH<sub>2</sub>Cl<sub>2</sub>). There are tautomers of [3-H][BF<sub>4</sub>], which were very difficult to furtherly separate. The residue was dissolved in CH<sub>2</sub>Cl<sub>2</sub> (10 mL) and was added to a Schlenk flask which was equipped with 5% Pd/C (760 mg, 0.357 mmol) under N<sub>2</sub> atmosphere. The flask was slightly degassed and flushed and H<sub>2</sub> introduced via a balloon. The mixture was stirred overnight under ambient conditions. After being filtered, the mixture was evaporated on a rotary evaporator to give the dark residue, which was subsequently purified through recrystallization. Yield: 187 mg, 44 %. <sup>1</sup>H NMR (400 MHz, CDCl<sub>3</sub>, 298 K) δ = 13.09 (s, 1H), 13.00 (s, 1H), 10.32 (s, 1H), 8.51 (d, 2H, J = 8.3 Hz), 8.39 (d, 2H, J = 8.3 Hz), 7.76 (d, 2H, J = 8.4 Hz), 7.62-7.58 (m, 4H), 7.45 (d, 2H, J = 8.4 Hz), 6.86 (dd, 2H, J<sub>1</sub> = 7.8 Hz, J<sub>2</sub> = 18.8 Hz), 6.49-6.44 (m, 2H), 6.21-6.12 (m, 4H), 4.24 (d, 2H, J = 11.6 Hz), 4.16 (d, 2H, J = 11.6 Hz), 3.80-3.25 (m, 24H), 3.22-3.15 (m, 4H), 2.97-2.84 (m, 4H), 1.45-1.42 (m, 18H), 1.37-1.29 (m, 8H). <sup>13</sup>C NMR (100 MHz, CDCl<sub>3</sub>, 298 K): δ 192.85, 152.41, 149.37, 147.59, 146.89, 139.08, 132.79, 132.38, 130.64, 130.10, 129.92, 129.30, 128.69, 128.47, 126.12, 125.73, 125.56, 125.09, 124.77, 121.80, 113.58, 111.82, 73.39, 70.26, 69.99, 69.72, 67.79, 67.69, 34.96, 32.01, 31.62, 31.56, 30.25, 29.78, 29.44, 28.86, 25.62, 22.77, 14.20. HR-MS (ESI): 1105.6148 calcd for C<sub>68</sub>H<sub>85</sub>N<sub>2</sub>O<sub>11</sub><sup>+</sup> [M+H]<sup>+</sup>, found: 1105.6156.

### Synthesis of **3**

20 equivalents of *t*-BuOK was added to a solution of [3-H][BF<sub>4</sub>] in either THF or CD<sub>2</sub>Cl<sub>2</sub> to give **3** *in situ*. The resultant product was used without further separation. <sup>1</sup>H NMR (400 MHz, CD<sub>2</sub>Cl<sub>2</sub>, 298 K) δ = 11.74 (s, 1H), 10.15 (m, 1H), 8.90 (m, 2H), 8.04 (m, 2H), 7.88 (m, 2H), 7.75 (m, 2H), 7.59 (m, 2H), 7.46 (m, 2H), 6.79 (s, 2H), 6.34 (m, 2H), 5.98 (m, 4H), 4.15 (m, 2H), 4.00 (m, 4H), 3.87-3.16 (m, 22H), 3.09 (m, 2H), 2.95 (m, 2H), 1.44 (m, 26H). HR-MS (ESI): 1105.6148 calcd for C<sub>68</sub>H<sub>85</sub>N<sub>2</sub>O<sub>11</sub><sup>+</sup> [M+H]<sup>+</sup>, found: 1105.6145.

### Determination of Association Constant between [1b-H][BF<sub>4</sub>] and **2c**

[1b-H][BF<sub>4</sub>] (3.41 mg, 5.925 μmol), **2c** (3.81 mg, 5.908 μmol), were dissolved in 0.590 mL of CDCl<sub>3</sub> and <sup>1</sup>H NMR spectrum of this solution was collected

subsequently. According to integration of peaks, the ratio of the concentration of the complex to  $[1b-H][BF_4]$  is 6.0393, while the ratio of the concentration of the complex to **2c** is 5.8181. The association constant  $K_A$  can be therefore determined as  $4.073 \times 10^3 \text{ L}\cdot\text{mol}^{-1}$ . Errors are estimated to be less than 10%.

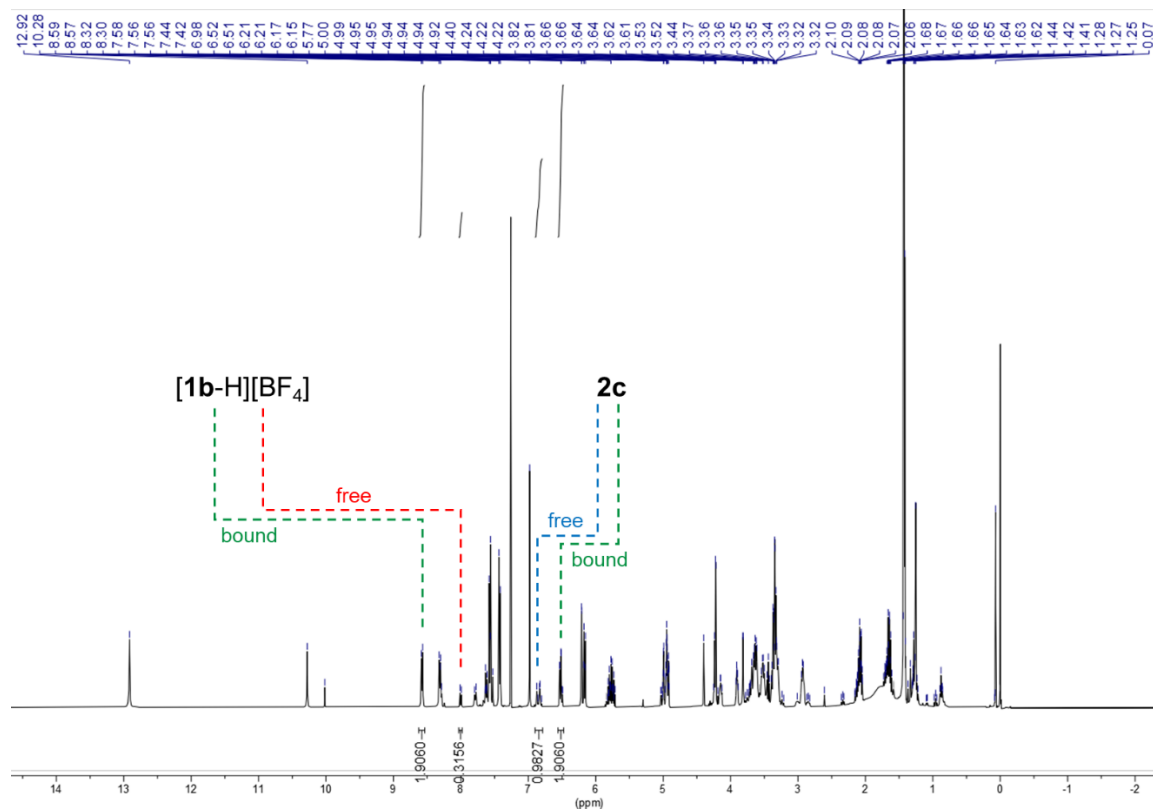

**Supplementary Figure 1.**  $^1\text{H}$  NMR Spectrum (400 MHz,  $\text{CDCl}_3$ , 298K) of a 1:1 mixture of  $[1b-H][BF_4]$  and **2c** in  $\text{CDCl}_3$ .



## NMR Spectra of Compounds

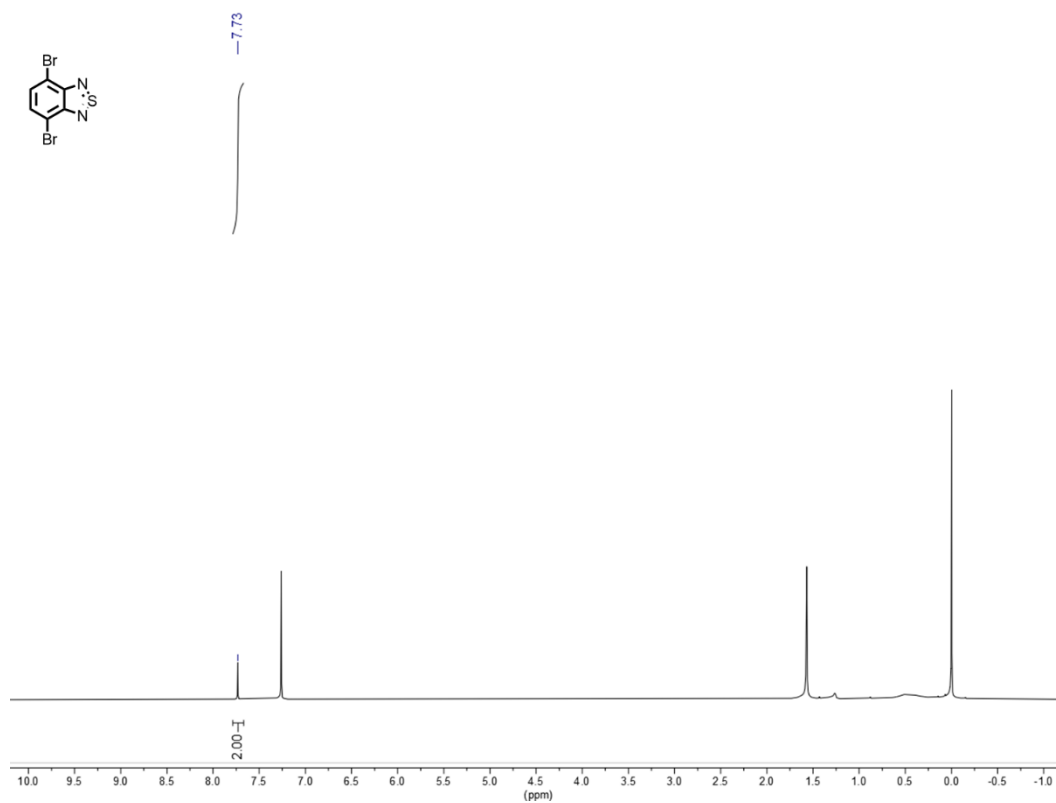

Supplementary Figure 2. <sup>1</sup>H NMR Spectrum (400 MHz, CDCl<sub>3</sub>, 298K) of 8.

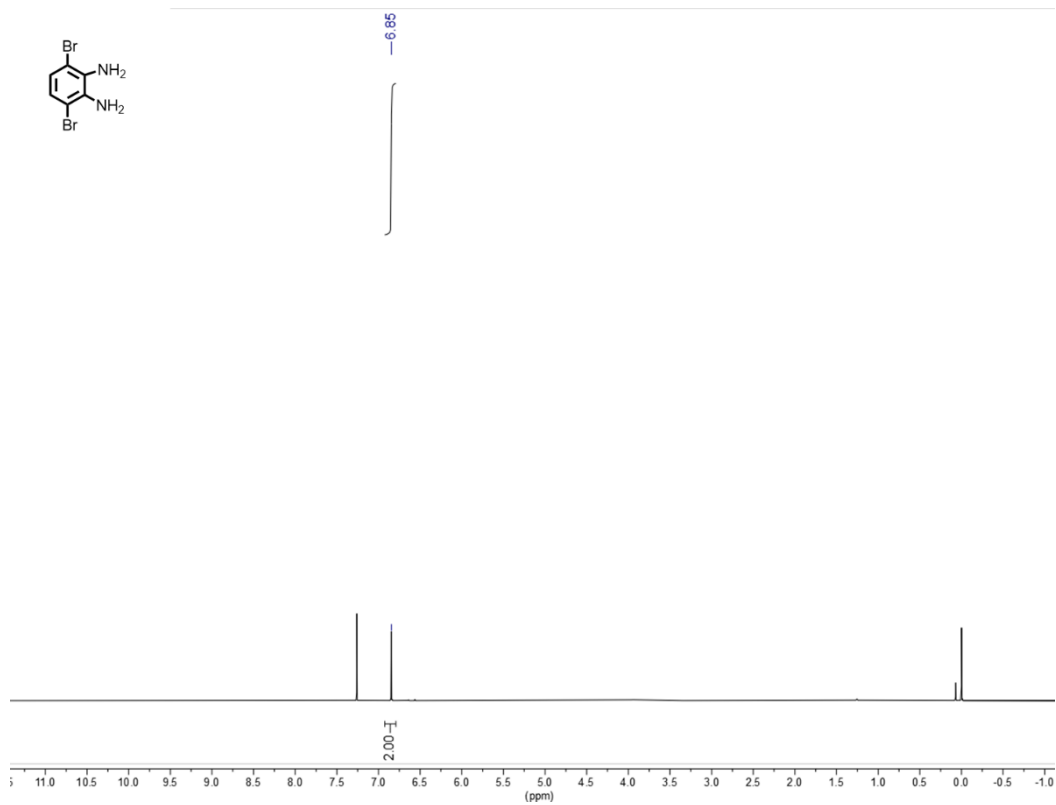

Supplementary Figure 3. <sup>1</sup>H NMR Spectrum (400 MHz, CDCl<sub>3</sub>, 298K) of 9.

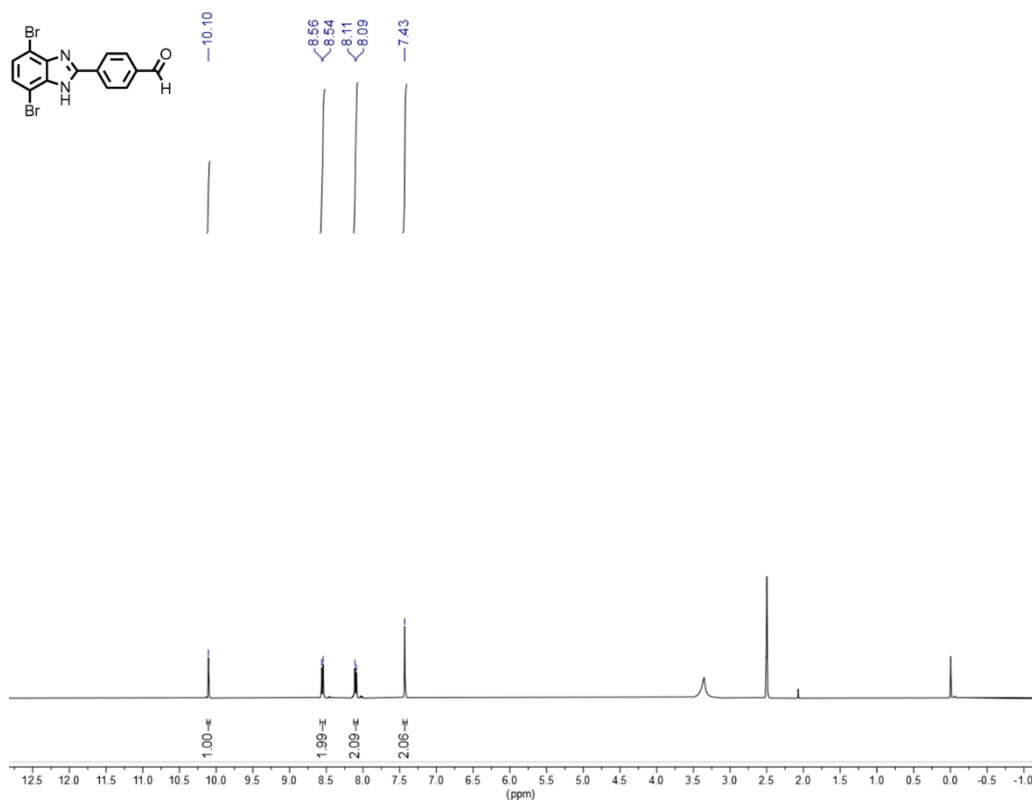

**Supplementary Figure 4.** <sup>1</sup>H NMR Spectrum (400 MHz, CD<sub>3</sub>SOCD<sub>3</sub>, 298K) of **4**.

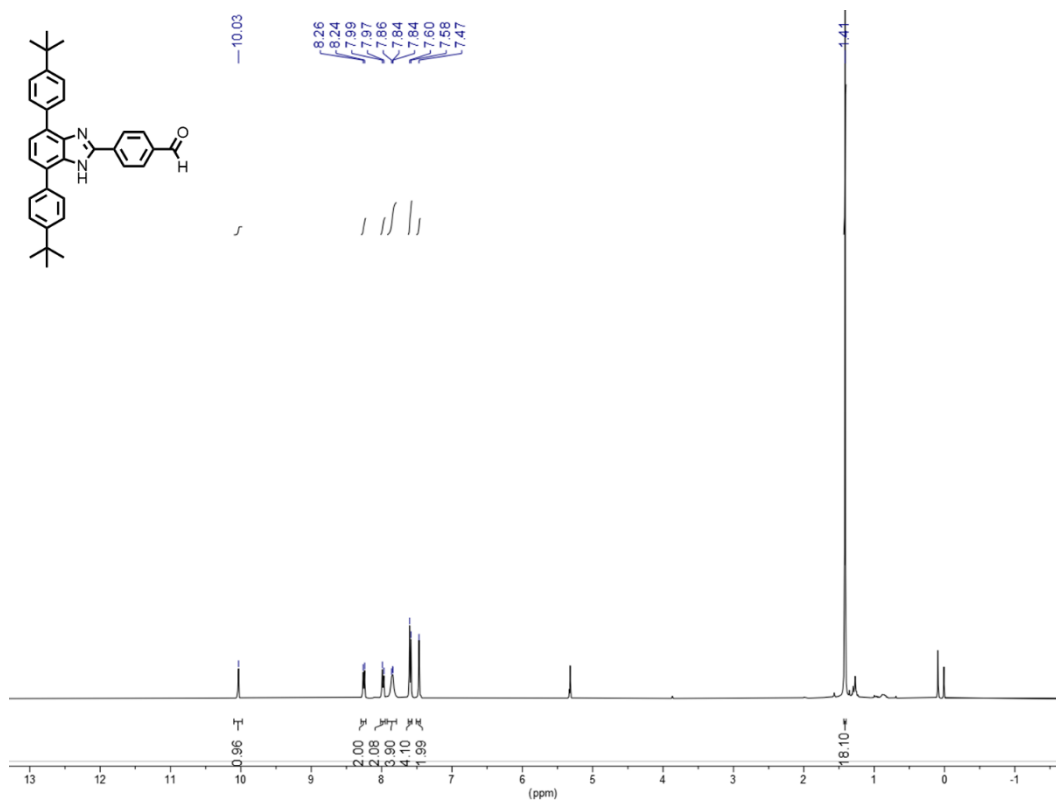

**Supplementary Figure 5.** <sup>1</sup>H NMR Spectrum (400 MHz, CD<sub>2</sub>Cl<sub>2</sub>, 298K) of **1b**.

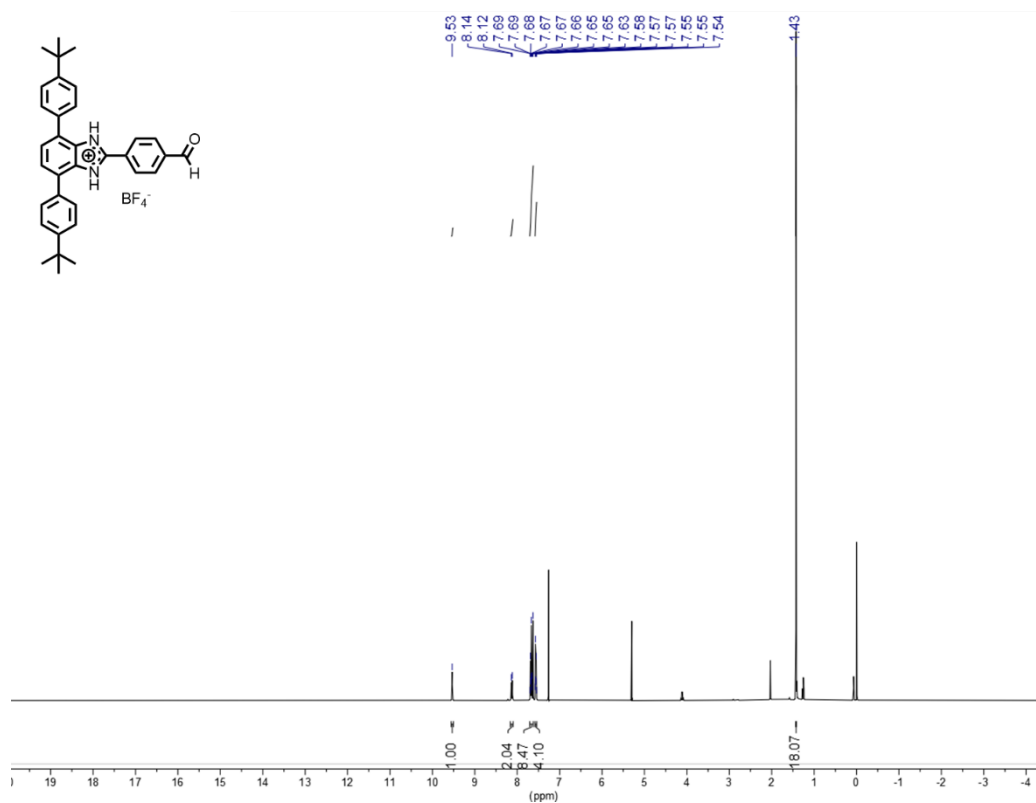

**Supplementary Figure 6.**  $^1\text{H}$  NMR Spectrum (400 MHz,  $\text{CDCl}_3$ , 298K) of  $[\mathbf{1b-H}][\text{BF}_4]$ .

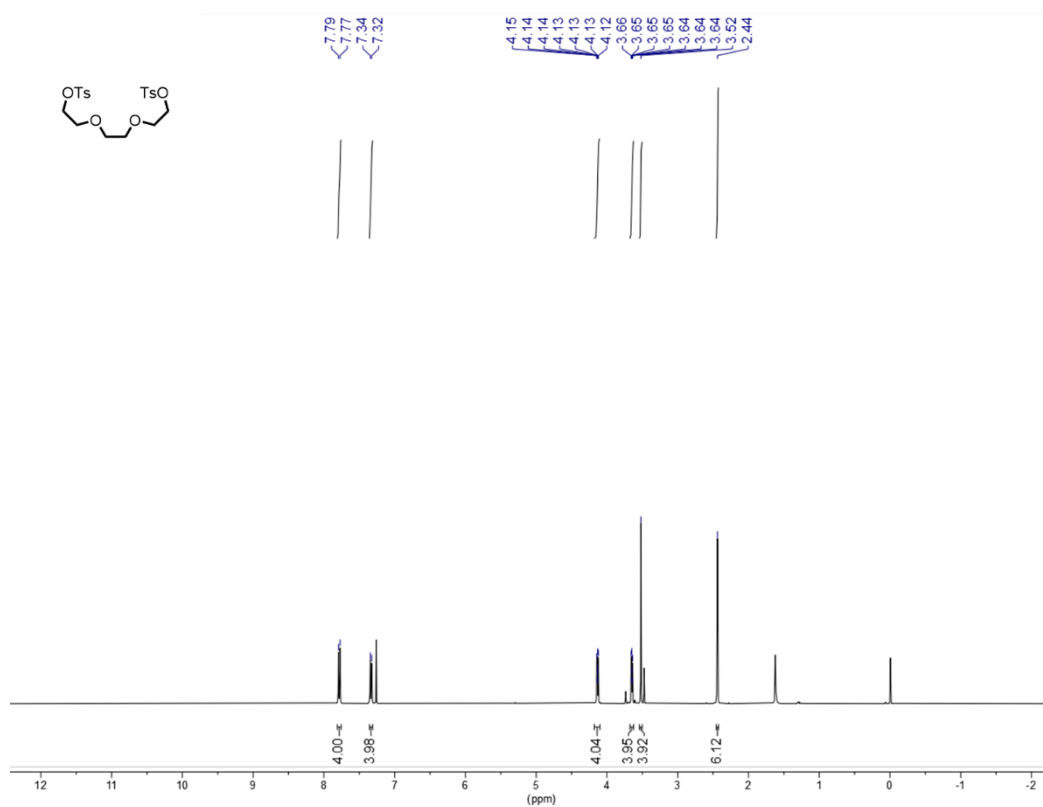

**Supplementary Figure 7.**  $^1\text{H}$  NMR Spectrum (400 MHz,  $\text{CDCl}_3$ , 298K) of **11**.

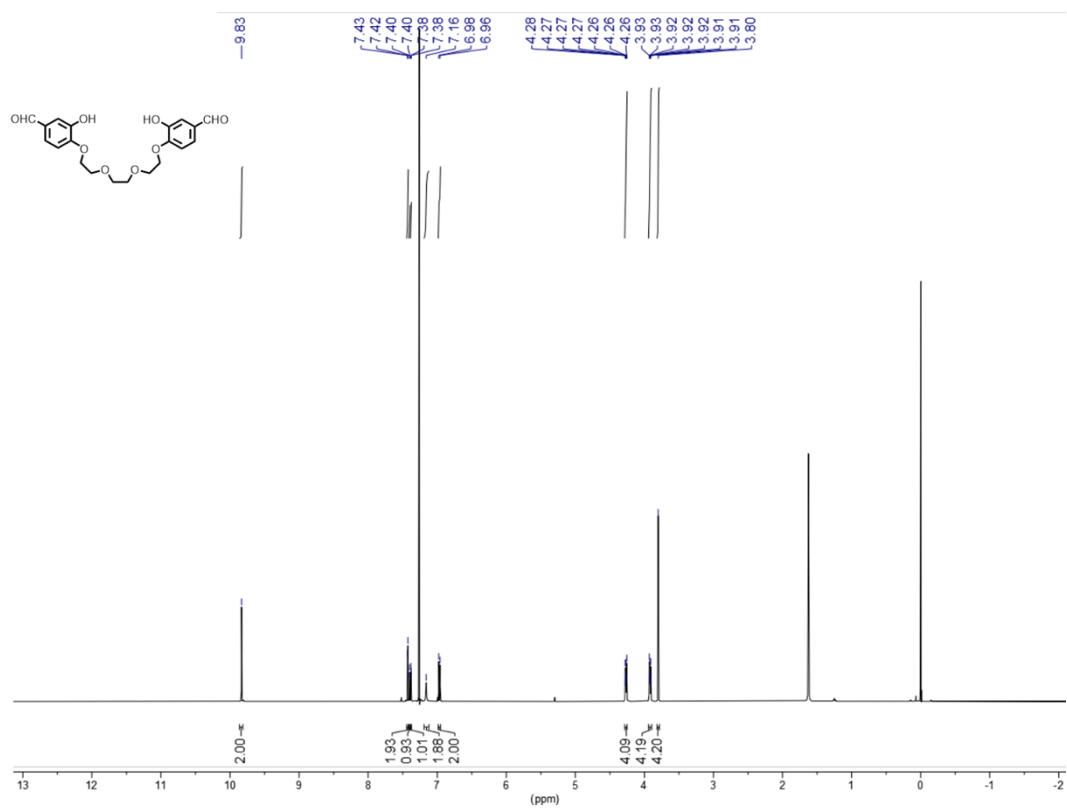

Supplementary Figure 8. <sup>1</sup>H NMR Spectrum (400 MHz, CDCl<sub>3</sub>, 298K) of 12.

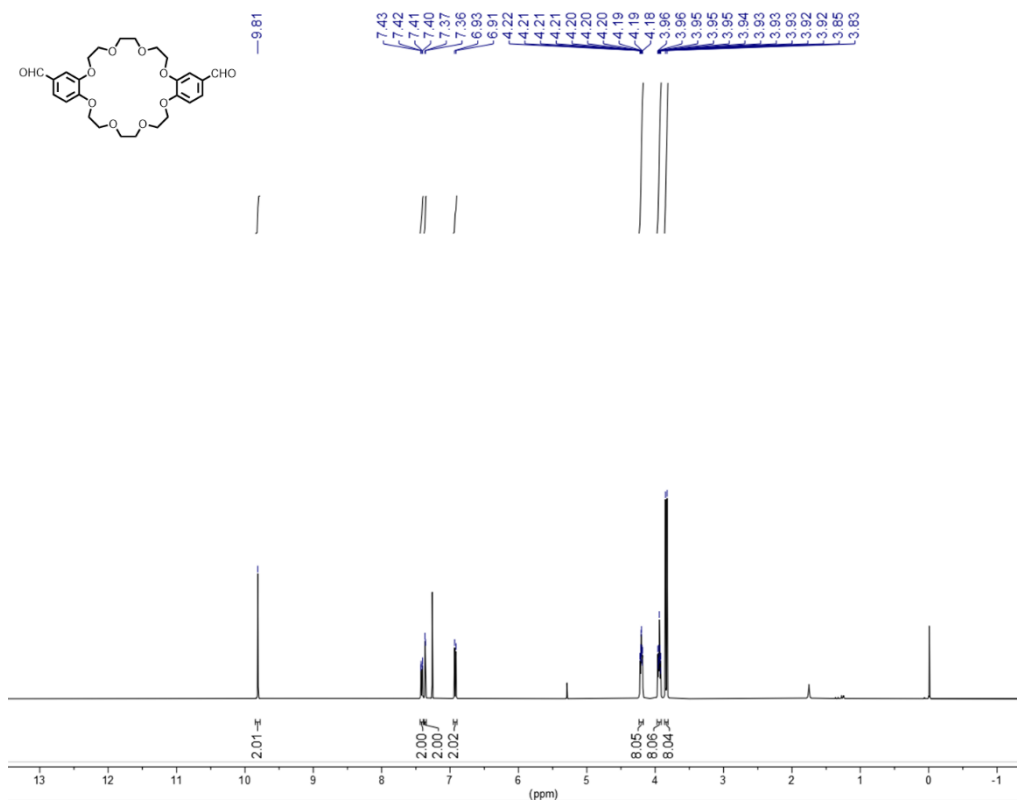

Supplementary Figure 9. <sup>1</sup>H NMR Spectrum (400 MHz, CDCl<sub>3</sub>, 298K) of 13.

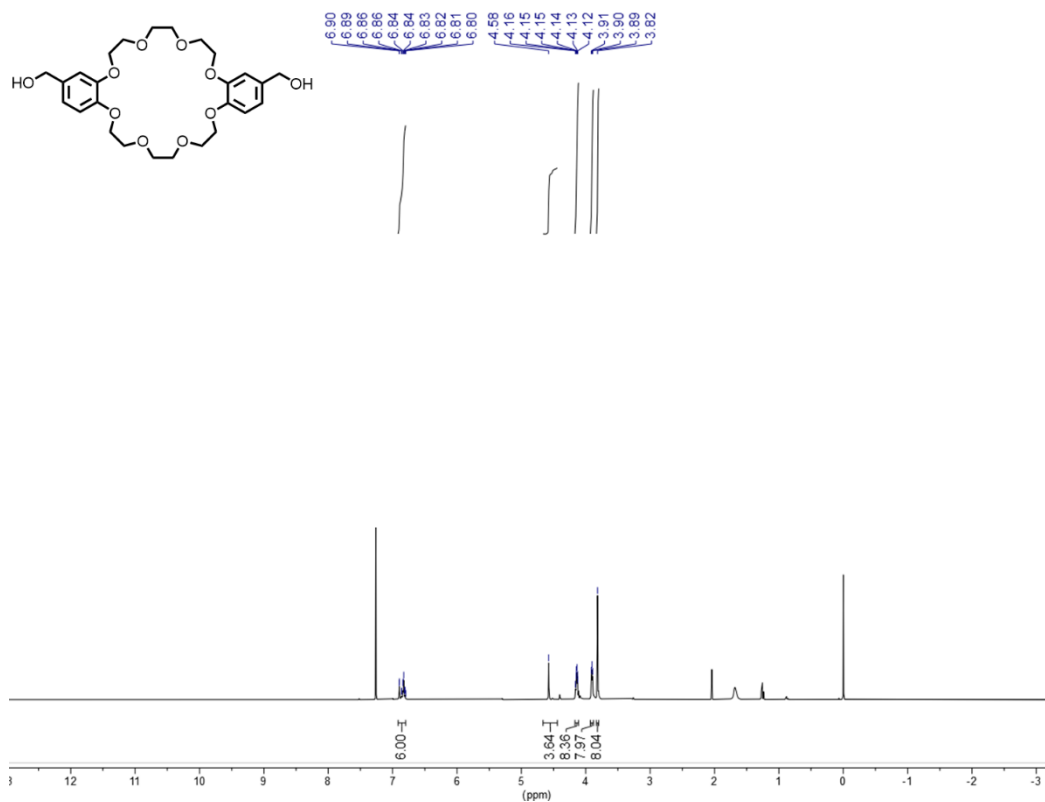

Supplementary Figure 10. <sup>1</sup>H NMR Spectrum (400 MHz, CDCl<sub>3</sub>, 298K) of 5.

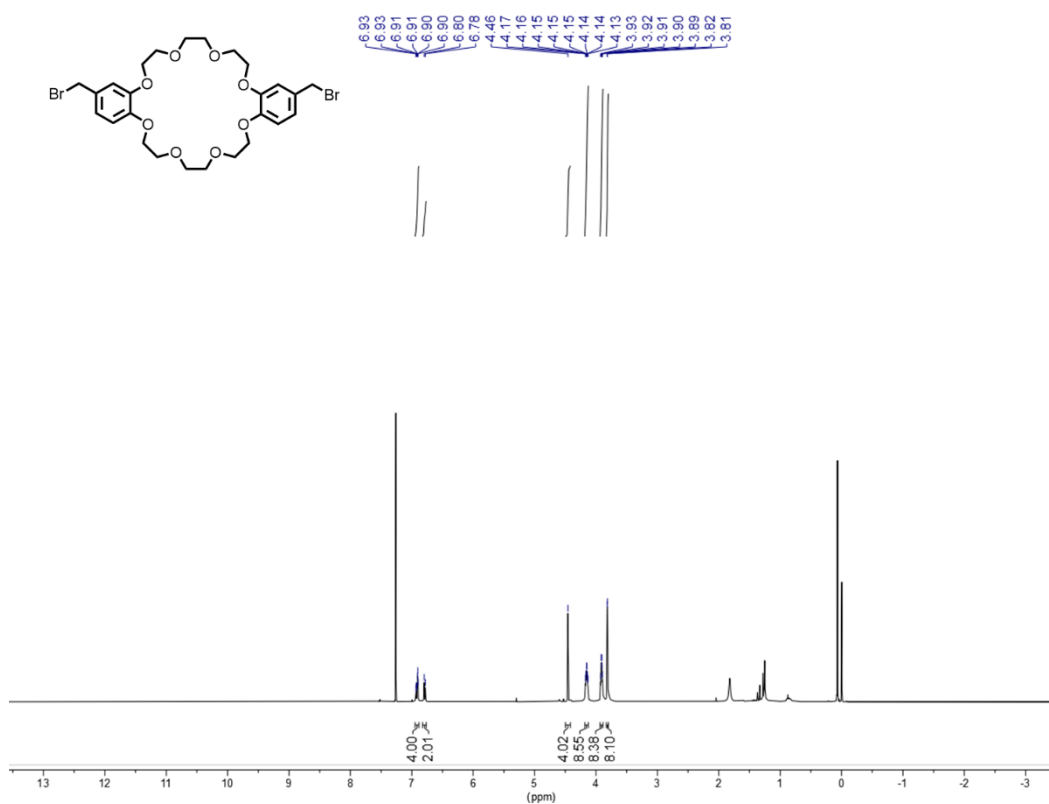

Supplementary Figure 11. <sup>1</sup>H NMR Spectrum (400 MHz, CDCl<sub>3</sub>, 298K) of 6.



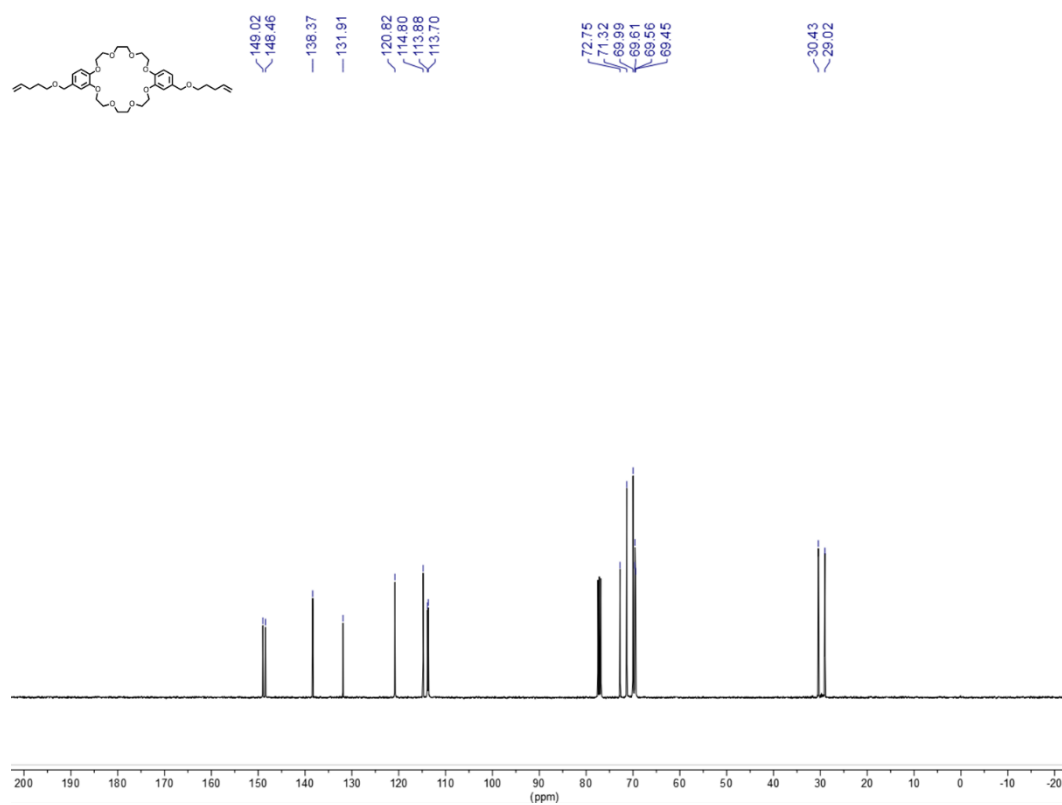

**Supplementary Figure 14.**  $^{13}\text{C}$  NMR Spectrum (100 MHz,  $\text{CDCl}_3$ , 298K) of **2c**.

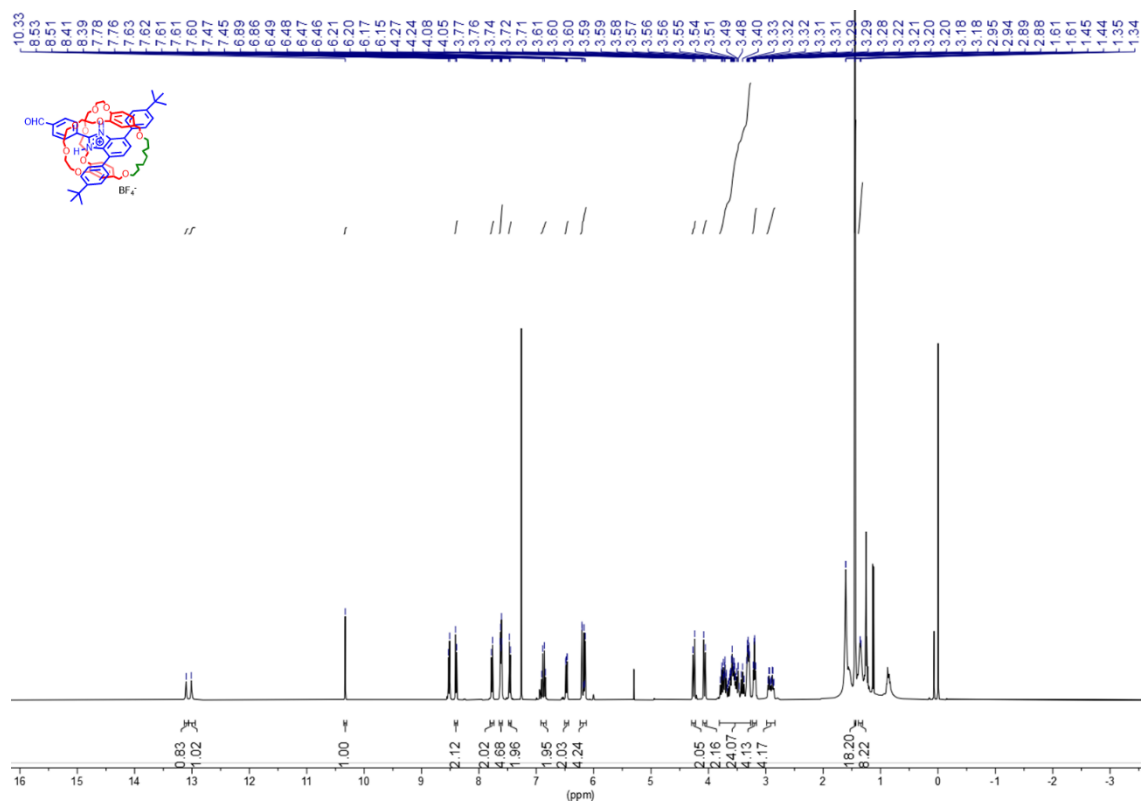

**Supplementary Figure 15.**  $^1\text{H}$  NMR Spectrum (400 MHz,  $\text{CDCl}_3$ , 298K) of **[3-H][BF<sub>4</sub>]**.

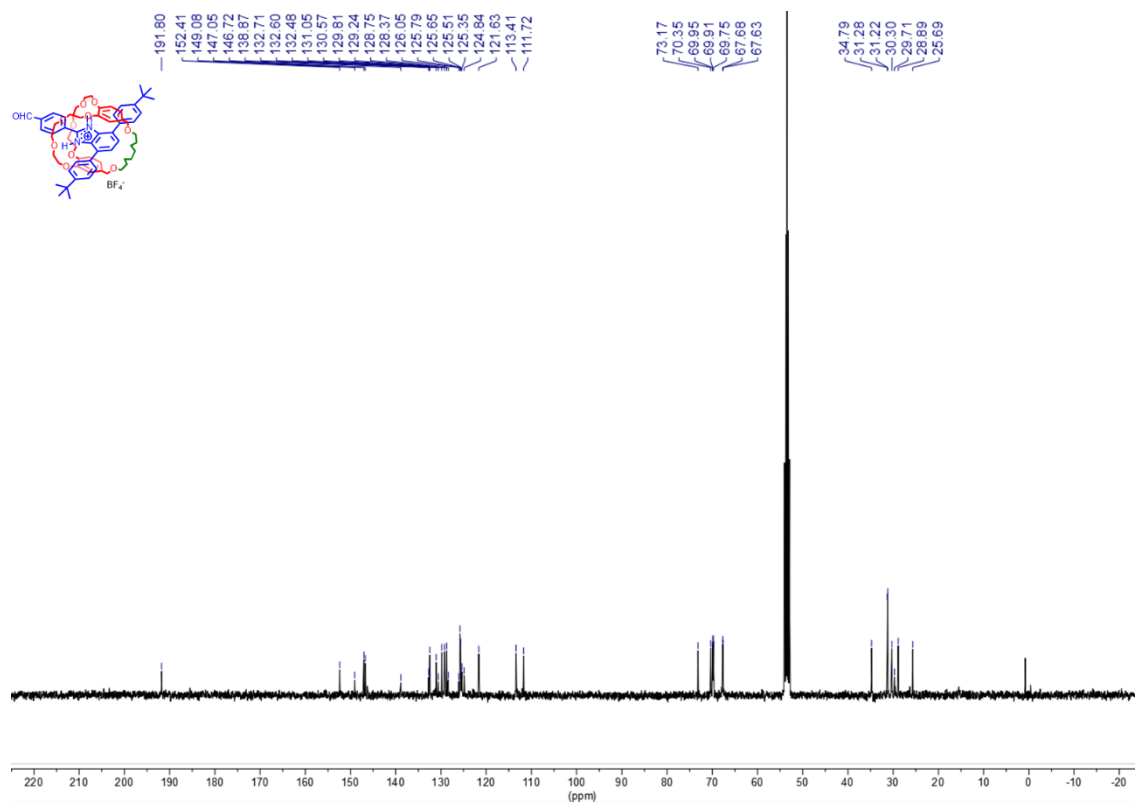

**Supplementary Figure 16.** <sup>13</sup>C NMR Spectrum (400 MHz, CDCl<sub>3</sub>, 298K) of [3-H][BF<sub>4</sub>].

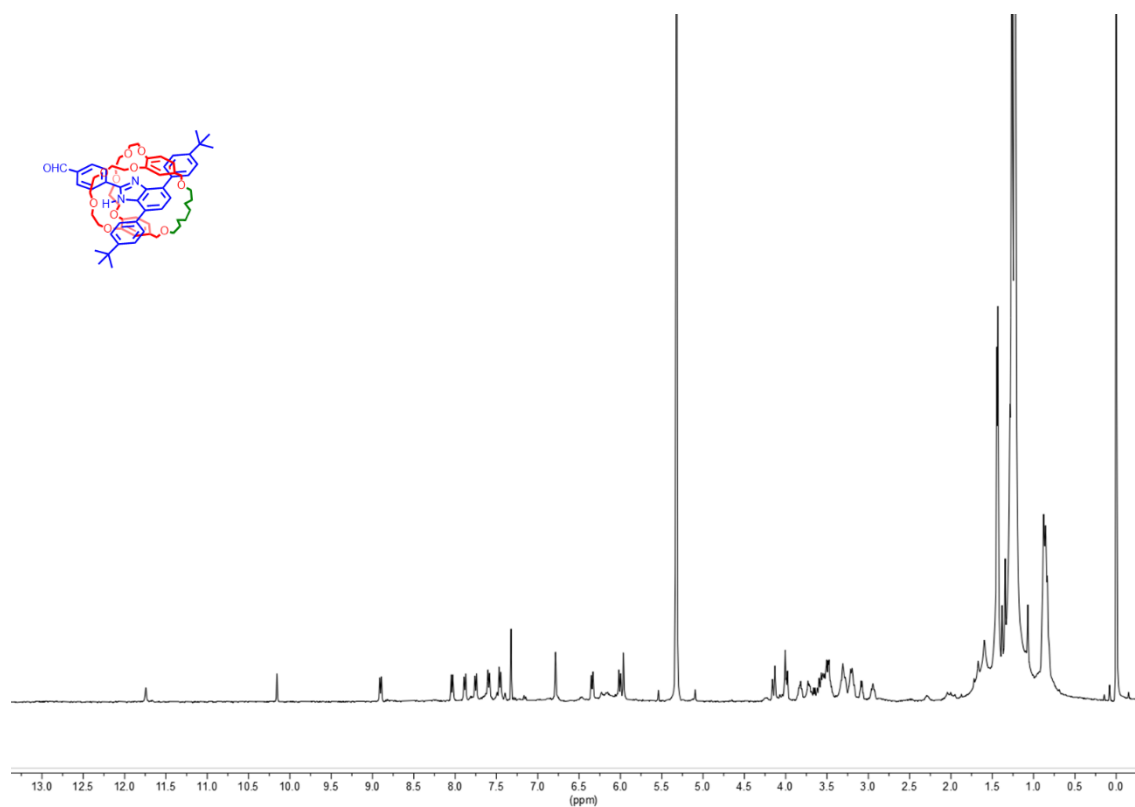

**Supplementary Figure 17.** <sup>1</sup>H NMR Spectrum (400 MHz, CDCl<sub>3</sub>, 298K) of 3 with excess *t*-BuOK.



## UV-Vis Spectra

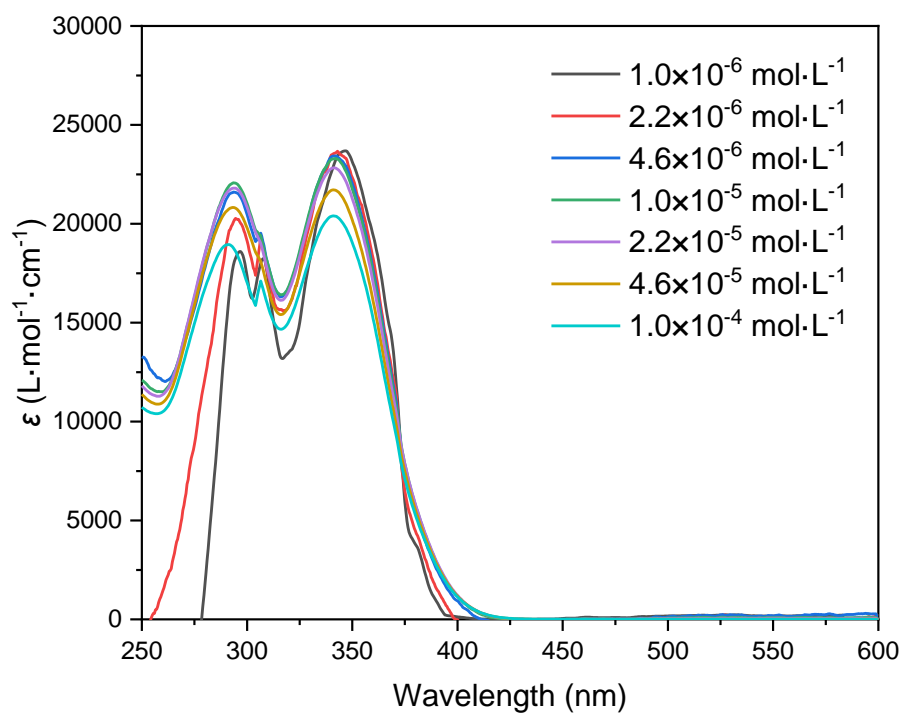

**Supplementary Figure 18.** UV-Vis absorption spectra of **1b** in THF from 1.0  $\mu\text{M}$  to  $1.0 \times 10^2 \mu\text{M}$ .

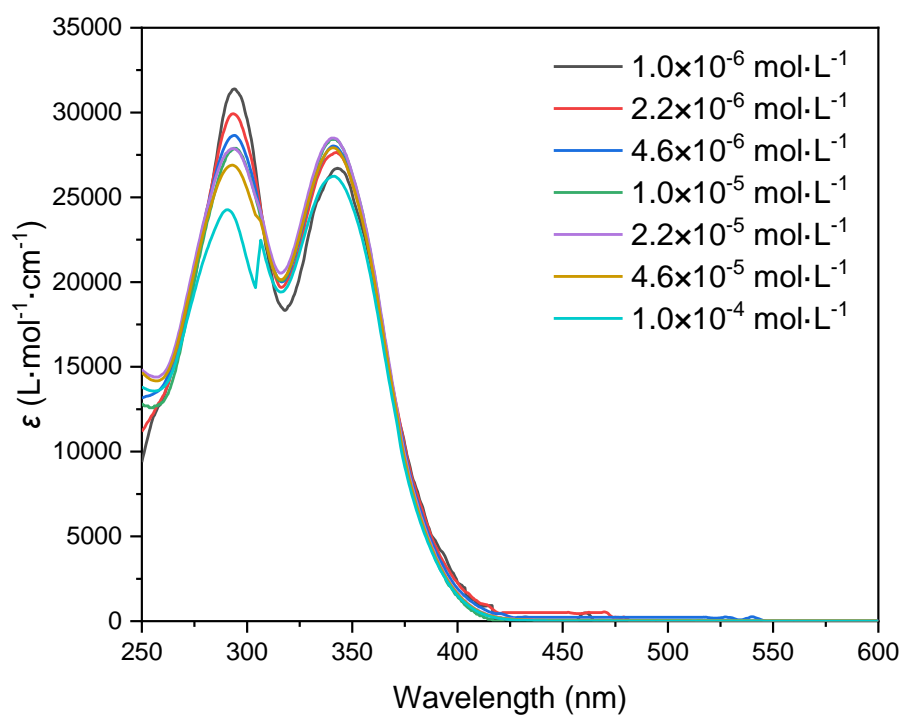

**Supplementary Figure 19.** UV-Vis absorption spectra of **[1b-H][BF<sub>4</sub>]** in THF from 1.0  $\mu\text{M}$  to  $1.0 \times 10^2 \mu\text{M}$ .

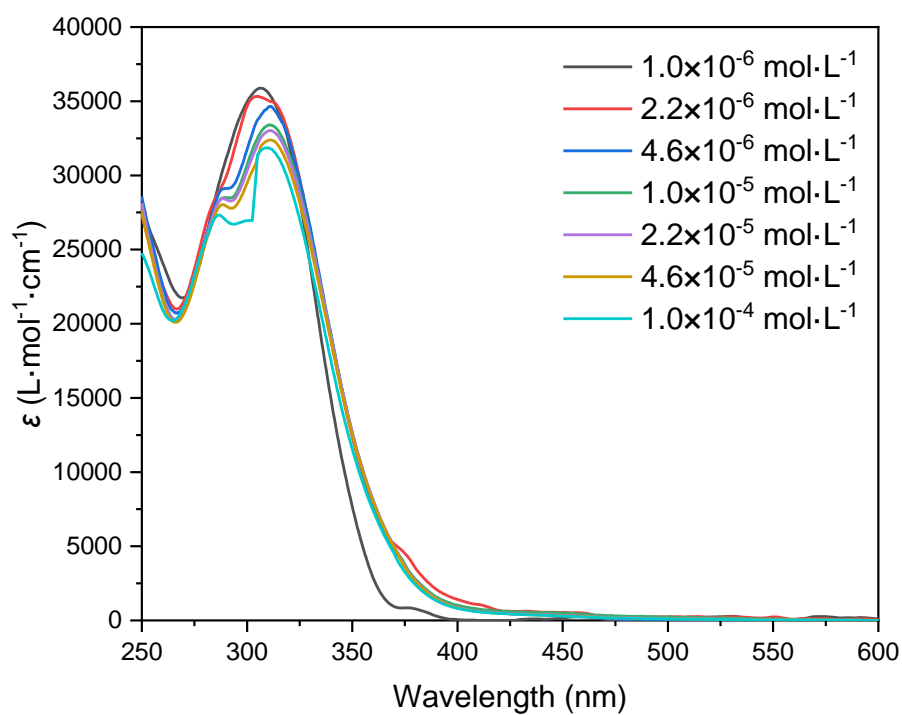

**Supplementary Figure 20.** UV-Vis absorption spectra of **3** in THF from 1.0  $\mu\text{M}$  to  $1.0 \times 10^2 \mu\text{M}$ .

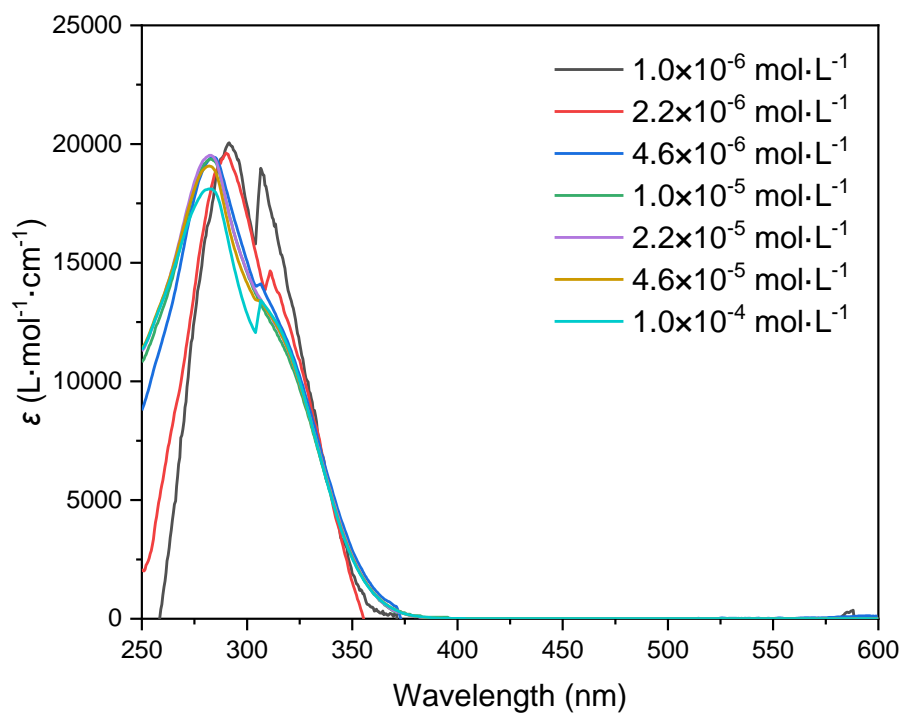

**Supplementary Figure 21.** UV-Vis absorption spectra of **[3-H][BF<sub>4</sub>]** in THF from 1.0  $\mu\text{M}$  to  $1.0 \times 10^2 \mu\text{M}$ .

### Fluorescence Emission Spectra

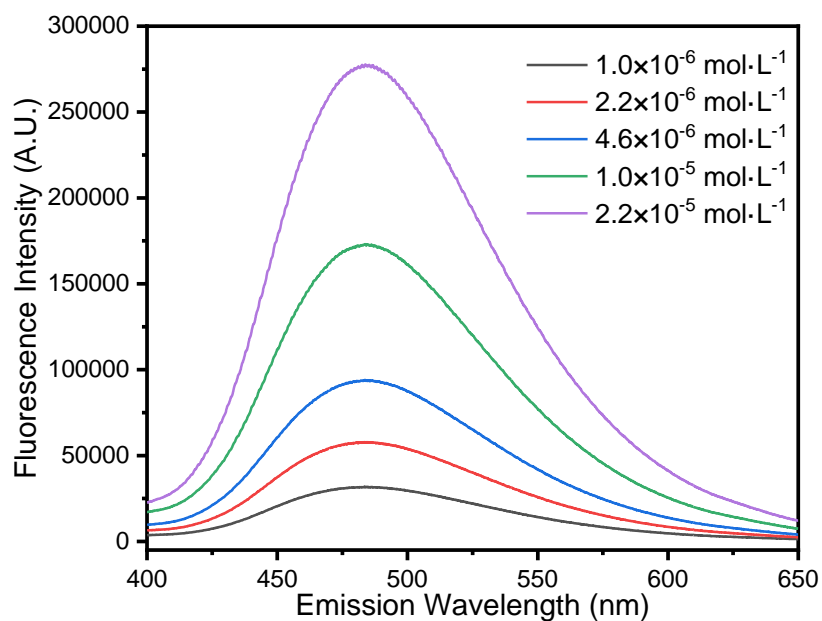

**Supplementary Figure 22.** Fluorescence emission spectra of **1b** (1.0  $\mu\text{M}$  to 22  $\mu\text{M}$ ) in THF, when excited at 342 nm.

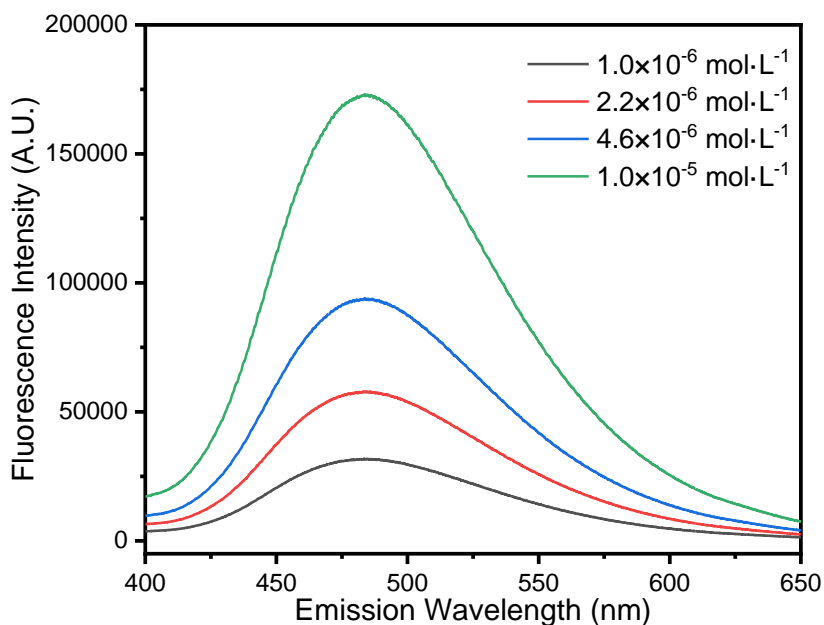

**Supplementary Figure 23.** Fluorescence emission spectra of [**1b-H**][ $\text{BF}_4$ ] (1.0  $\mu\text{M}$  to 22  $\mu\text{M}$ ) in THF, when excited at 342 nm.

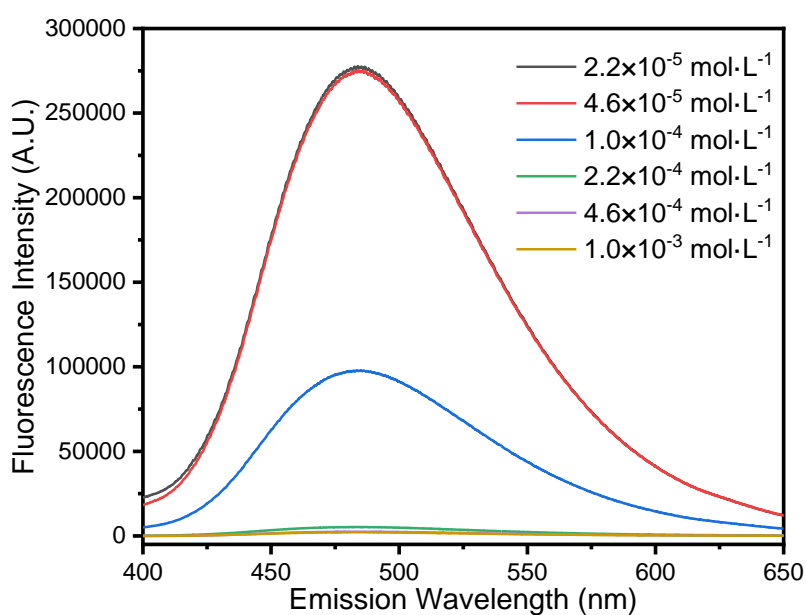

**Supplementary Figure 24.** Fluorescence emission spectra of [**1b-H**][ $\text{BF}_4$ ] (46  $\mu\text{M}$  to  $1.0 \times 10^3 \mu\text{M}$ ) in THF, when excited at 342 nm.

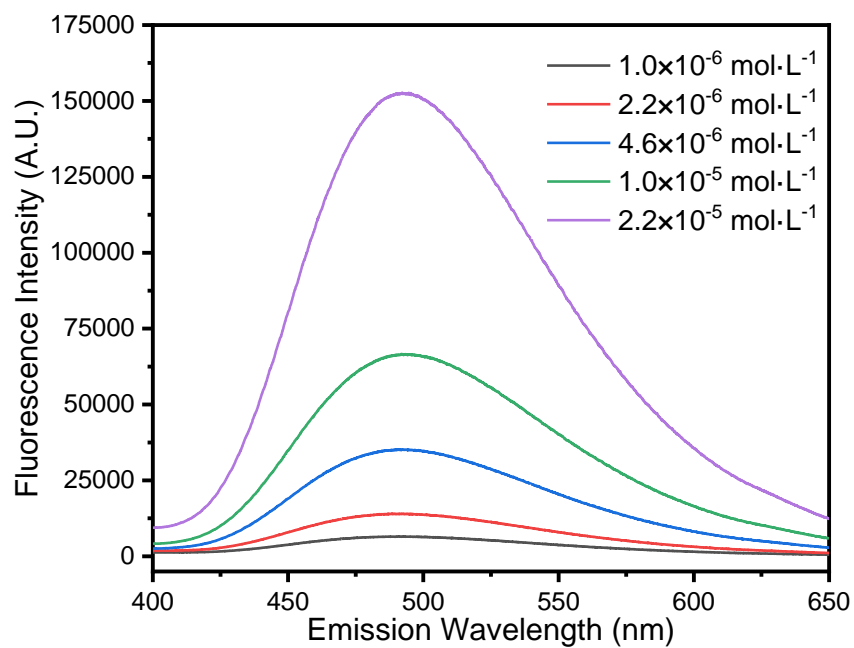

**Supplementary Figure 25.** Fluorescence emission spectra of **3** (1.0  $\mu\text{M}$  to 46  $\mu\text{M}$ ) in THF, when excited at 342 nm.

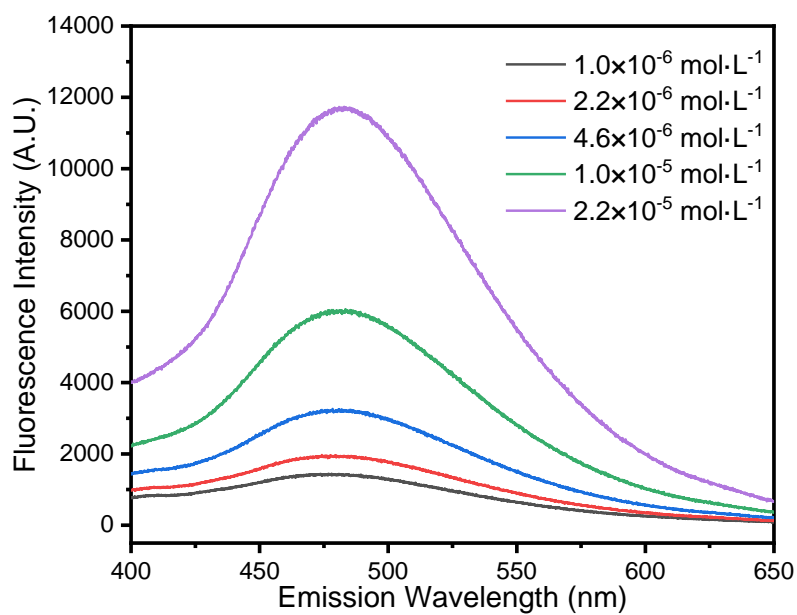

**Supplementary Figure 26.** Fluorescence emission spectra of  $[\mathbf{3}\text{-H}][\text{BF}_4]$  (1.0  $\mu\text{M}$  to 22  $\mu\text{M}$ ) in THF, when excited at 342 nm.

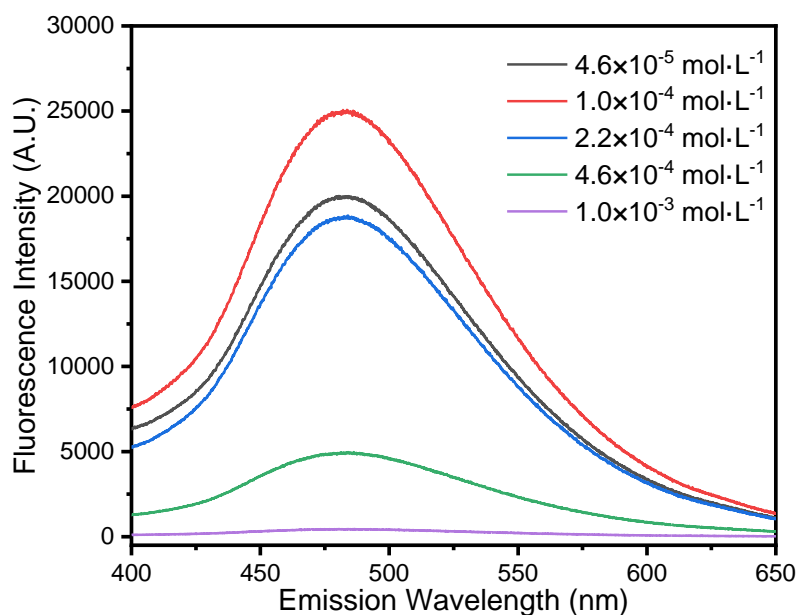

**Supplementary Figure 27.** Fluorescence emission spectra of **[3-H][BF<sub>4</sub>]** (46  $\mu\text{M}$  to  $1.0 \times 10^3 \mu\text{M}$ ) in THF, when excited at 342 nm.

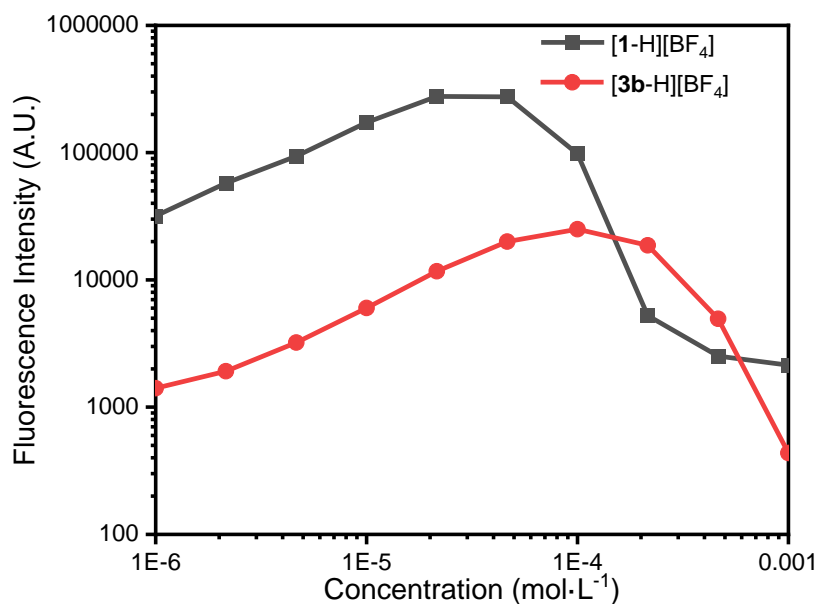

**Supplementary Figure 28.** Fluorescent intensities of **[1b-H][BF<sub>4</sub>]** and **[3b-H][BF<sub>4</sub>]** as a function of concentration in THF, when excited at 342 nm.

## Details of Fluorescence Quantum Yields

The fluorescence emission quantum yields of solution samples were measured on a Hamamatsu C9920-02G absolute PL quantum yield measurement system. Quantum yields were recorded with samples of solutions with a concentration of  $1 \times 10^{-5} \text{ mol} \cdot \text{L}^{-1}$ . Excitation wavelength was 342 nm for solutions with DCM or THF as solvents, 341 nm for solutions with DMF as solvent.

**Table S1.** Quantum yields ( $\Phi_e$ ) of Solutions Used in This Study

| Sample          | <b>1b</b> | [ <b>1b-H</b> ][BF <sub>4</sub> ] | <b>3</b> | [ <b>3-H</b> ][BF <sub>4</sub> ] |
|-----------------|-----------|-----------------------------------|----------|----------------------------------|
| $\Phi_e$ in DCM | 0.494     | 0.490                             | 0.124    | 0.032                            |
| $\Phi_e$ in THF | 0.457     | 0.439                             | 0.332    | 0.158                            |
| $\Phi_e$ in DMF | 0.425     | 0.427                             | 0.123    | 0.118                            |

The fluorescence quantum yields of solid powders were measured on a spectrometer (FLS980) from Edinburgh Instruments Ltd. with an integrating sphere ( $\varphi$  150 mm).

**Table S2.** Quantum yields ( $\Phi_e$ ) of Solid Powders Used in This Study

| Sample   | <b>1b</b> | [ <b>1b-H</b> ][BF <sub>4</sub> ] | <b>3</b> | [ <b>3-H</b> ][BF <sub>4</sub> ] |
|----------|-----------|-----------------------------------|----------|----------------------------------|
| $\Phi_e$ | 0.025     | 0.221                             | 0.217    | 0.198                            |

## Details of X-ray Crystallography

Reflection data for [3-H][BF<sub>4</sub>] were collected on a Rigaku SuperNova, Dual, AtlasS2 diffractometer using monochromatized Cu K $\alpha$  radiation. Crystals were frozen in paratone oil inside a cryoloop under a cold stream of N<sub>2</sub>. Diffraction data and unit-cell parameters were consistent with assigned space groups. Lorentzian polarization corrections and empirical absorption corrections, based on redundant data at varying effective azimuthal angles, were applied to the data sets. The structures were solved using OLEX<sup>2</sup> crystallography software with SHELX programs.<sup>3,4</sup> When practical, non-hydrogen atoms were refined anisotropically and hydrogen atoms placed in idealized positions and refined using a riding model.

**Table S3.** Crystal Data, Solution and Refinement Parameters

|                              | [3-H][BF <sub>4</sub> ]                                                        | 1b                                               |
|------------------------------|--------------------------------------------------------------------------------|--------------------------------------------------|
| CCDC number                  | 2043996                                                                        | 2043995                                          |
| formula                      | C <sub>68</sub> H <sub>85</sub> N <sub>2</sub> O <sub>11</sub> BF <sub>4</sub> | C <sub>34</sub> H <sub>34</sub> N <sub>2</sub> O |
| Formula weight               | 1193.23                                                                        | 486.63                                           |
| Crystal system               | Monoclinic                                                                     | Triclinic                                        |
| Space group                  | <i>P</i> 21/ <i>m</i>                                                          | <i>P</i> -1                                      |
| <i>T</i> (K)                 | 100.0                                                                          | 149.99(10)                                       |
| <i>a</i> (Å)                 | 15.4345(8)                                                                     | 11.6578(3)                                       |
| <i>b</i> (Å)                 | 27.2605(16)                                                                    | 12.4438(3)                                       |
| <i>c</i> (Å)                 | 18.4100(11)                                                                    | 13.0555(4)                                       |
| $\alpha$ (°)                 | 90                                                                             | 63.465(3)                                        |
| $\beta$ (°)                  | 115.234(2)                                                                     | 72.555(2)                                        |
| $\gamma$ (°)                 | 90                                                                             | 65.144(3)                                        |
| <i>V</i> (Å <sup>3</sup> )   | 7006.9(7)                                                                      | 1522.76(9)                                       |
| <i>Z</i>                     | 1                                                                              | 2                                                |
| $\rho$ (g·cm <sup>-3</sup> ) | 0.163                                                                          | 1.061                                            |
| $\mu$ (mm <sup>-1</sup> )    | 0.080                                                                          | 0.490                                            |
| reflections used             | 74132                                                                          | 18924                                            |
| variables                    | 1182                                                                           | 369                                              |
| restraints                   | 88                                                                             | 0                                                |



|                                 |        |        |
|---------------------------------|--------|--------|
| $R_1[ I > 2\sigma(I)]^{[a]}$    | 0.0872 | 0.0410 |
| $R_1$ (all data)                | 0.2377 | 0.1133 |
| $R_{2w}[ I > 2\sigma(I)]^{[b]}$ | 0.1069 | 0.0459 |
| $R_{2w}$ (all data)             | 0.2542 | 0.1180 |
| GoF on $F^2$                    | 1.028  | 1.056  |

<sup>[a]</sup>  $R_1 = \sum ||F_o| - |F_c|| / \sum |F_o|$ ; <sup>[b]</sup>  $R_{2w} = [\sum w(F_o^2 - F_c^2)^2 / w(F_o^2)^2]^{1/2}$ , where  $w = q[\sigma^2(F_o^2) + (aP)^2 + bP]^{-1}$

### References

1. F. S. Mancilha, B. A. DaSilveira Neto, A. S. Lopes, P. F. Moreira Jr, F. H. Quina, R. S. Gonçalves and J. Dupont, *Eur. J. Org. Chem.*, 2006, **4**, 4924-4933.
2. A. M. Elizarov, T. Chang, S.-H. Chiu and J. F. Stoddart, *Org. Lett.*, 2002, **4**, 3565-3568.
3. O.V. Dolomanov, L.J. Bourhis, R.J. Gildea, J.A.K. Howard, H. Puschmann, *J. Appl. Cryst.*, 2009, **42**, 339-341.
4. G.M. Sheldrick, *Acta Cryst. A*, 2008, **64**, 112–122.
